# Supplementary material for: Independent Maternal and Fetal Genetic Effects on Midgestational Circulating Levels of Environmental Pollutants
Source: PubMed Central journal article supplement (PMC5386877; doi:10.1534/g3.117.039784), 2017-02-24
Supplement: 1287FileS1.pdf [file 1287FileS1.pdf]

**Table S1.** Self-reported ancestry of n=790 mothers

| Ancestry group | N   | percentage (%) | N cases | N controls | Stratification <sup>a</sup> |
|----------------|-----|----------------|---------|------------|-----------------------------|
| HIS            | 329 | 41.6%          | 148     | 181        | PC1****; PC2***; PC5**      |
| CAU            | 273 | 34.5%          | 141     | 132        | NS                          |
| ASN            | 122 | 15.4%          | 68      | 54         | PC9*                        |
| SOUTH ASN      | 23  | 2.9%           | 10      | 13         | NS                          |
| AFR            | 21  | 2.7%           | 11      | 10         | PC8*                        |
| OTHERS         | 22  | 2.8%           | 10      | 12         |                             |

<sup>a</sup> Significant differences across ancestry components between case-control data tested with two-sample Mann-Whitney Wilcoxon test; \*\*\*\*p-value < 0.0005; \*\*\* P<0.001; \*\* P<0.01; \*P<0.05; . P<0.1

Abbreviations: CAU: Caucasians; ASN: Asians; HIS: Hispanics; SOUTH ASN: Indians; AFR: African-Americans; OTHERS: mixed ancestry, unknown ancestry, other ancestry (based on self-reported ancestry groups); PC: ancestry components

**Table S2.** Significance of sociodemographic confounding factors in linear regression models of 19 organohalogen and PCB and PBDE sums

| compound                                     | age        |          | multiparity |          | education  |          | country of birth |          | month of birth |          | offspring gender |          | ancestry |
|----------------------------------------------|------------|----------|-------------|----------|------------|----------|------------------|----------|----------------|----------|------------------|----------|----------|
|                                              | <i>dir</i> | <i>P</i> | <i>dir</i>  | <i>P</i> | <i>dir</i> | <i>P</i> | <i>dir</i>       | <i>P</i> | <i>dir</i>     | <i>P</i> | <i>dir</i>       | <i>P</i> | <i>P</i> |
| Persistent Pesticides                        |            |          |             |          |            |          |                  |          |                |          |                  |          |          |
| p,p'-DDE                                     | +          | ***      | -           | ***      | -          | **       | +                | ***      | +              | **       | +                |          | ***      |
| T-NONA                                       | +          | ***      | -           | ***      | -          | NS       | -                | ***      | -              | NS       | -                | NS       | **       |
| Polybrominated diphenyl ethers and biphenyls |            |          |             |          |            |          |                  |          |                |          |                  |          |          |
| BB-153                                       | +          | ***      | +           | NS       | +          | ***      | -                | ***      | +              | **       | -                | NS       | **       |
| BDE-28                                       | -          | *        | +           | *        | -          | NS       | -                |          | -              | *        | +                | NS       | NS       |
| BDE-47                                       | -          | ***      | +           | *        | +          | NS       | -                | **       | -              | NS       | +                | NS       | NS       |
| BDE-99                                       | -          | ***      | +           | ***      | -          | NS       | -                |          | -              | NS       | +                | NS       | *        |
| BDE-100                                      | -          | ***      | +           | *        | +          |          | -                | **       | -              |          | +                | NS       | NS       |
| BDE-153                                      | -          | **       | +           | NS       | -          |          | -                | ***      | -              |          | -                | NS       | ***      |
| Sum PBDE                                     | -          | **       | +           | **       | +          |          | -                | **       | -              | NS       | +                | NS       | *        |
| Polychlorinated biphenyls                    |            |          |             |          |            |          |                  |          |                |          |                  |          |          |
| PCB28                                        | +          | NS       | -           | NS       | -          | *        | +                | NS       | -              | **       | +                | *        | *        |
| PCB99                                        | +          | ***      | -           | ***      | +          | **       | -                |          | +              | NS       | -                | NS       | ***      |
| PCB118                                       | +          | ***      | -           | ***      | +          | *        | -                | *        | -              | NS       | +                | NS       | ***      |
| PCB153                                       | +          | ***      | -           | ***      | +          | ***      | +                | NS       | +              |          | -                | NS       | ***      |
| PCB170                                       | +          | ***      | -           | **       | +          | **       | +                | NS       | +              | NS       | -                | NS       | ***      |
| PCB180                                       | +          | ***      | -           | *        | +          | ***      | +                | NS       | +              | NS       | -                | NS       | ***      |
| PCB187                                       | +          | ***      | -           | NS       | +          | ***      | +                | NS       | +              | NS       | -                | NS       | ***      |
| PCB194                                       | +          | ***      | -           | NS       | +          | *        | -                | NS       | +              | *        | -                | NS       | ***      |
| PCB199                                       | +          | ***      | -           | NS       | +          | **       | -                | *        | +              | NS       | -                | NS       | ***      |
| PCB138/158                                   | +          | ***      | -           | ***      | +          | **       | +                | NS       | +              | NS       | -                | NS       | ***      |
| PCB196/203                                   | +          | ***      | -           | NS       | +          | **       | -                | **       | +              | NS       | -                | NS       | ***      |
| Sum PCB                                      | +          | ***      | -           |          | +          |          | +                | NS       | +              | NS       | +                | NS       | ***      |

Abbreviations: *dir*: direction; *P*: p-value; NS: not significant  
 \*\*\*\*p-value < 0.0005; \*\*\* P<0.001; \*\* P<0.01; \*P<0.05; . P<0.1

**Table S3.** Compressed maternal genome-wide summary-level results for each compound

**Table S4.** Compressed neonatal genome-wide summary-level results for each compound

**Table S5.** Quartile analysis in EMA genotyped dataset consistent with EMA full dataset showed in Table 3 in Lyall et al., 2016(Lyall *et al.*2016).

|                   | Odds of ASD relative to GP controls |                           |                           |
|-------------------|-------------------------------------|---------------------------|---------------------------|
|                   | Unadjusted OR (95% CI)              | AOR (95% CI) <sup>^</sup> | AOR (95% CI) <sup>#</sup> |
| <b>PCB138_158</b> |                                     |                           |                           |
| Q1                | 1                                   | 1                         | 1                         |
| Q2                | 0.97 (0.91, 1.03)                   | 0.99 (0.93, 1.06)         | 1.00 (0.94, 1.06)         |
| Q3                | 0.99 (0.93, 1.05)                   | 0.98 (0.92, 1.04)         | 0.97 (0.92, 1.04)         |
| Q4                | <b>1.14 (1.06, 1.21)</b>            | 1.04 (0.99, 1.10)         | 1.03 (0.98,1.09)          |
| <b>PCB153</b>     |                                     |                           |                           |
| Q1                | 1                                   | 1                         | 1                         |
| Q2                | 0.95 (0.89, 1.01)                   | 0.97 (0.91, 1.03)         | 0.98 (0.92, 1.03)         |
| Q3                | 0.97 (0.91, 1.03)                   | 0.96 (0.90, 1.03)         | 0.96 (0.90, 1.02)         |
| Q4                | <b>1.17 (1.09, 1.25)</b>            | <b>1.07 (1.02, 1.13)</b>  | <b>1.06 (1.01, 1.12)</b>  |

Abbreviations: ASD Autism spectrum disorder; GP general population controls. Bold indicates statistical significance ( $p < 0.05$ )

<sup>^</sup>Adjusted for matching factors (offspring gender, month and year of birth), maternal age (continuous), maternal race/ethnicity (Non-Hispanic White, Asian, Black/Pacific Islander/or other, Hispanic, or missing), maternal weight at time of sample collection (quartiles), parity (multi- vs primiparous), and maternal education (<high school, high school, college, graduate). Removal of race/ethnicity from these models did not materially alter estimates; maternal age and parity were the only significant covariates in models and adjustment for these factors only yielded AORs similar to fully adjusted estimates. Models adjusted only for matching factors yielded estimates nearly identical as unadjusted models.

<sup>#</sup>Adjusted for EMA genotyped dataset covariates (offspring gender, month of birth, maternal age, maternal education, country of birth, multiparity, PC1-10)

**Table S6.** Maternal top genetic loci genome-wide and suggestively associated with mid-gestational levels of organohalogenes

| <b>compound</b>                              | <b>SNP</b>        | <b>CHR</b> | <b>BP</b>        | <b>MAF</b>  | <b>beta</b>  | <b>SE</b>   | <b>P</b>                    | <b>locus</b>                          |
|----------------------------------------------|-------------------|------------|------------------|-------------|--------------|-------------|-----------------------------|---------------------------------------|
| Persistent Pesticides                        |                   |            |                  |             |              |             |                             |                                       |
| <b>p,p'-DDE</b>                              | <b>rs7259965</b>  | <b>19</b>  | <b>41521532</b>  | <b>0.29</b> | <b>0.32</b>  | <b>0.05</b> | <b>7.8x10<sup>-11</sup></b> | <b>CYP2B6</b>                         |
| T-NONA                                       | rs1181906         | 7          | 155977316        | 0.14        | -0.17        | 0.04        | 5.7 x10 <sup>-6</sup>       | <i>lincRNA</i>                        |
| Polybrominated diphenyl ethers and biphenyls |                   |            |                  |             |              |             |                             |                                       |
| <i>BB-153</i>                                | <i>rs56385737</i> | <i>18</i>  | <i>4414795</i>   | <i>0.05</i> | <i>0.44</i>  | <i>0.08</i> | <i>3.1x10<sup>-7</sup></i>  | <i>DLGAP1</i>                         |
| <b>BDE-28</b>                                | <b>rs11789653</b> | <b>9</b>   | <b>17993589</b>  | <b>0.03</b> | <b>0.65</b>  | <b>0.12</b> | <b>3.2x10<sup>-8</sup></b>  | <b>ADAMTSL1<br/>SH3GL2</b>            |
| <i>BDE-47</i>                                | <i>rs2855812</i>  | <i>6</i>   | <i>31472720</i>  | <i>0.21</i> | <i>-0.33</i> | <i>0.07</i> | <i>7.9x10<sup>-7</sup></i>  | <i>MICB</i>                           |
| <b>BDE-99</b>                                | <b>rs7259965</b>  | <b>19</b>  | <b>41521532</b>  | <b>0.29</b> | <b>0.32</b>  | <b>0.06</b> | <b>2.1x10<sup>-8</sup></b>  | <b>CYP2B6</b>                         |
| <i>BDE-100</i>                               | <i>rs2855812</i>  | <i>6</i>   | <i>31472720</i>  | <i>0.21</i> | <i>-0.35</i> | <i>0.07</i> | <i>2.9x10<sup>-7</sup></i>  | <i>MICB</i>                           |
| BDE-153                                      | rs17506613        | 8          | 38594656         | 0.48        | -0.27        | 0.06        | 1.1x10 <sup>-6</sup>        | <i>TACC1</i>                          |
| Sum PBDE                                     | rs2855812         | 6          | 31472720         | 0.21        | -0.29        | 0.06        | 1.8x10 <sup>-6</sup>        | <i>MICB</i>                           |
| Polychlorinated biphenyls                    |                   |            |                  |             |              |             |                             |                                       |
| PCB28                                        | rs11727994        | 4          | 91911417         | 0.35        | -0.34        | 0.07        | 1.6x10 <sup>-6</sup>        | <i>TMSB4XP8</i>                       |
| PCB99                                        | rs1812081         | 2          | 134279837        | 0.40        | 0.13         | 0.03        | 4.8x10 <sup>-6</sup>        | <i>MGAT5</i>                          |
| PCB118                                       | rs8076755         | 17         | 13788655         | 0.02        | -0.51        | 0.11        | 7.5x10 <sup>-6</sup>        | <i>HS3ST3A1<br/>COX10</i>             |
| PCB153                                       | rs76546227        | 15         | 33276215         | 0.02        | -0.55        | 0.11        | 1.0x10 <sup>-6</sup>        | <i>FMN1</i>                           |
| PCB170                                       | rs10826182        | 10         | 60164820         | 0.32        | 0.15         | 0.03        | 2.1x10 <sup>-6</sup>        | <i>TFAM<br/>BICC1</i>                 |
| PCB180                                       | rs4946957         | 6          | 109641411        | 0.39        | -0.15        | 0.03        | 1.2x10 <sup>-6</sup>        | <i>CCDC162P<br/>CEP57L1<br/>CD164</i> |
| <i>PCB187</i>                                | <i>rs10500669</i> | <i>11</i>  | <i>6328472</i>   | <i>0.23</i> | <i>0.20</i>  | <i>0.04</i> | <i>2.5x10<sup>-7</sup></i>  | <i>PRKCDBP</i>                        |
| <i>PCB194</i>                                | <i>rs75107653</i> | <i>3</i>   | <i>4181811</i>   | <i>0.02</i> | <i>0.57</i>  | <i>0.11</i> | <i>1.3x10<sup>-7</sup></i>  | <i>SETMAR<br/>SUMF1</i>               |
| <i>PCB199</i>                                | <i>rs4945829</i>  | <i>6</i>   | <i>109638828</i> | <i>0.43</i> | <i>-0.17</i> | <i>0.03</i> | <i>3.7x10<sup>-7</sup></i>  | <i>CCDC162P<br/>CEP57L1</i>           |

|                   |                   |          |                  |             |              |             |                            |                                                   |
|-------------------|-------------------|----------|------------------|-------------|--------------|-------------|----------------------------|---------------------------------------------------|
|                   |                   |          |                  |             |              |             |                            | <i>CD164</i>                                      |
| PCB138/158        | rs76546227        | 15       | 33276215         | 0.02        | -0.59        | 0.12        | 9.4x10 <sup>-7</sup>       | <i>FMN1</i>                                       |
| <i>PCB196/203</i> | <i>rs75107653</i> | <i>3</i> | <i>4181811</i>   | <i>0.02</i> | <i>0.57</i>  | <i>0.11</i> | <i>8.6x10<sup>-8</sup></i> | <i>SETMAR</i><br><i>SUMF1</i>                     |
| <i>PCB196/203</i> | <i>rs4945829</i>  | <i>6</i> | <i>109638828</i> | <i>0.43</i> | <i>-0.16</i> | <i>0.03</i> | <i>1.1x10<sup>-7</sup></i> | <i>CCDC162P</i><br><i>CEP57L1</i><br><i>CD164</i> |
| <i>Sum PCB</i>    | <i>rs35560597</i> | <i>5</i> | <i>52678868</i>  | <i>0.01</i> | <i>0.79</i>  | <i>0.15</i> | <i>7.9x10<sup>-8</sup></i> | <i>FST</i><br><i>NDUFS4</i>                       |

In each category the results are shown in alphanumeric order. The genome-wide significant associations are shown in **bold** and the suggestively significant associations are in *italics*. Genome-wide association threshold is  $P=5 \times 10^{-8}$  and suggestive association threshold is  $P=5 \times 10^{-7}$ .

Abbreviations: CHR: chromosome; BP: position; SE: standard error

**Table S7.** Suggestively and nominally significant association between maternal chr3:rs75107653, chr6:rs4945829, chr11:rs10500669 and PCB congeners

| compound   | chr3:rs75107653 - MAF=0.016 |             |             |                            | chr6:rs4945829 - MAF=0.43 |              |             |                            | chr11:rs10500669 - MAF=0.23 |            |             |                            |
|------------|-----------------------------|-------------|-------------|----------------------------|---------------------------|--------------|-------------|----------------------------|-----------------------------|------------|-------------|----------------------------|
|            | N                           | beta        | SE          | p-value                    | N                         | beta         | SE          | p-value                    | N                           | beta       | SE          | p-value                    |
| PCB28      | 763                         | 0.5         | 0.24        | 3.7x10 <sup>-2</sup>       | 762                       | 0.05         | 0.07        | NS                         | 760                         | -0.05      | 0.08        | NS                         |
| PCB118     | 714                         | 0.24        | 0.11        | 2.7x10 <sup>-2</sup>       | 713                       | -0.07        | 0.03        | 2.4x10 <sup>-2</sup>       | 711                         | 0.04       | 0.03        | NS                         |
| PCB153     | 755                         | 0.24        | 0.11        | 2.4x10 <sup>-2</sup>       | 754                       | -0.12        | 0.03        | 2.8x10 <sup>-5</sup>       | 752                         | 0.12       | 0.03        | 4.1x10 <sup>-4</sup>       |
| PCB170     | 727                         | 0.39        | 0.11        | 1.9x10 <sup>-4</sup>       | 726                       | -0.13        | 0.03        | 1.2x10 <sup>-5</sup>       | 724                         | 0.15       | 0.03        | 9.5x10 <sup>-6</sup>       |
| PCB180     | 759                         | 0.41        | 0.11        | 1.9x10 <sup>-4</sup>       | 758                       | -0.14        | 0.03        | 3.6x10 <sup>-6</sup>       | 756                         | 0.15       | 0.03        | 1.7x10 <sup>-5</sup>       |
| PCB187     | 714                         | 0.38        | 0.12        | 1.6x10 <sup>-3</sup>       | 713                       | -0.16        | 0.03        | 2.6x10 <sup>-6</sup>       | <i>711</i>                  | <i>0.2</i> | <i>0.04</i> | <i>2.5x10<sup>-7</sup></i> |
| PCB194     | <i>712</i>                  | <i>0.57</i> | <i>0.11</i> | <i>1.3x10<sup>-7</sup></i> | 711                       | -0.15        | 0.03        | 6.5x10 <sup>-7</sup>       | 709                         | 0.15       | 0.03        | 1.5x10 <sup>-6</sup>       |
| PCB199     | 715                         | 0.56        | 0.12        | 1.6x10 <sup>-6</sup>       | <i>714</i>                | <i>-0.17</i> | <i>0.03</i> | <i>3.7x10<sup>-7</sup></i> | 712                         | 0.17       | 0.04        | 5.2x10 <sup>-6</sup>       |
| PCB138/158 | 752                         | 0.18        | 0.11        | NS                         | 751                       | -0.12        | 0.03        | 9.1x10 <sup>-5</sup>       | 749                         | 0.11       | 0.04        | 3.1x10 <sup>-3</sup>       |
| PCB196/203 | <i>715</i>                  | <i>0.57</i> | <i>0.11</i> | <i>8.6x10<sup>-8</sup></i> | <i>714</i>                | <i>-0.16</i> | <i>0.03</i> | <i>1.1x10<sup>-7</sup></i> | 712                         | 0.17       | 0.03        | 1.0x10 <sup>-6</sup>       |
| Sum PCB    | 706                         | 0.4         | 0.12        | 4.8x10 <sup>-4</sup>       | 705                       | -0.04        | 0.03        | NS                         | 703                         | 0.07       | 0.04        | NS                         |

In each category the results are shown in alphanumeric order. Suggestively significant associations are shown in *italics*. Suggestive association threshold is  $P=5 \times 10^{-7}$ . Abbreviations: MAF: minor allele frequency; SE: standard error; NS: not significant

**Table S8.** Genome wide and nominally significant association in fetal chr9:rs72692916 and chr18:rs72913475 across organohalogenes

| compound                                     | chr9:rs72692916 - MAF=0.05 |              |             |                            | chr18:rs72913475 - MAF=0.08 |             |             |                            |
|----------------------------------------------|----------------------------|--------------|-------------|----------------------------|-----------------------------|-------------|-------------|----------------------------|
|                                              | N                          | beta         | SE          | p-value                    | N                           | beta        | SE          | p-value                    |
| Persistent Pesticides                        |                            |              |             |                            |                             |             |             |                            |
| T-NONA                                       | 644                        | 0.05         | 0.07        | NS                         | 664                         | 0.15        | 0.05        | 5.5x10 <sup>-3</sup>       |
| Polybrominated diphenyl ethers and biphenyls |                            |              |             |                            |                             |             |             |                            |
| BB-153                                       | 635                        | -0.15        | 0.09        | NS                         | 655                         | 0.16        | 0.07        | 2.3x10 <sup>-2</sup>       |
| BDE-28                                       | 629                        | -0.10        | 0.08        | NS                         | 649                         | 0.26        | 0.07        | 1.2x10 <sup>-4</sup>       |
| BDE-47                                       | 686                        | -0.20        | 0.12        | NS                         | <i>708</i>                  | <i>0.51</i> | <i>0.10</i> | <i>2.9x10<sup>-7</sup></i> |
| BDE-99                                       | 666                        | -0.16        | 0.12        | NS                         | 688                         | 0.33        | 0.10        | 7.2x10 <sup>-4</sup>       |
| BDE-100                                      | 675                        | -0.27        | 0.13        | 3.6x10 <sup>-2</sup>       | <b>697</b>                  | <b>0.55</b> | <b>0.10</b> | <b>4.6x10<sup>-8</sup></b> |
| BDE153                                       | 674                        | -0.29        | 0.12        | 2.0x10 <sup>-2</sup>       | 696                         | 0.44        | 0.10        | 7.1x10 <sup>-6</sup>       |
| Sum PBDE                                     | 640                        | -0.26        | 0.11        | 1.8x10 <sup>-2</sup>       | 660                         | 0.35        | 0.09        | 1.8x10 <sup>-4</sup>       |
| Polychlorinated biphenyls                    |                            |              |             |                            |                             |             |             |                            |
| PCB99                                        | 642                        | -0.22        | 0.06        | 3.0x10 <sup>-4</sup>       | 709                         | 0.10        | 0.05        | 4.3x10 <sup>-2</sup>       |
| PCB118                                       | 644                        | -0.20        | 0.07        | 2.9x10 <sup>-3</sup>       | 664                         | 0.09        | 0.06        | NS                         |
| PCB153                                       | 681                        | -0.30        | 0.07        | 1.0x10 <sup>-5</sup>       | 703                         | 0.13        | 0.05        | 2.0x10 <sup>-2</sup>       |
| PCB170                                       | 654                        | -0.32        | 0.07        | 1.7x10 <sup>-6</sup>       | 675                         | 0.12        | 0.55        | 2.9x10 <sup>-2</sup>       |
| PCB180                                       | 683                        | -0.34        | 0.07        | 7.6x10 <sup>-7</sup>       | 705                         | 0.12        | 0.55        | 3.6x10 <sup>-2</sup>       |
| PCB187                                       | <b>644</b>                 | <b>-0.42</b> | <b>0.08</b> | <b>2.8x10<sup>-8</sup></b> | 664                         | 0.11        | 0.06        | NS                         |
| PCB194                                       | 642                        | -0.31        | 0.07        | 7.0x10 <sup>-6</sup>       | 662                         | 0.10        | 0.06        | NS                         |
| PCB199                                       | 645                        | -0.36        | 0.07        | 1.3x10 <sup>-6</sup>       | 665                         | 0.09        | 0.06        | NS                         |
| PCB138/158                                   | 676                        | -0.26        | 0.07        | 2.8x10 <sup>-4</sup>       | 698                         | 0.11        | 0.06        | NS                         |
| PCB196/203                                   | 645                        | -0.33        | 0.07        | 1.5x10 <sup>-6</sup>       | 665                         | 0.12        | 0.05        | 3.5x10 <sup>-2</sup>       |
| Sum PCB                                      | 637                        | -0.26        | 0.07        | 4.9x10 <sup>-4</sup>       | 657                         | 0.08        | 0.06        | NS                         |

In each category the results are shown in alphanumeric order. The genome-wide significant associations are shown in **bold** and the suggestively significant associations are in *italics*. Genome-wide association threshold is  $P=5 \times 10^{-8}$  and suggestive association threshold is  $P=5 \times 10^{-7}$ . Abbreviations: MAF: minor allele frequency; SE: standard error; NS: not significant



**Table S9.** Fetal genetic loci genome-wide, suggestively and nominally associated with mid-gestational levels of organohalogenes

| compound       | SNP               | CHR       | BP                 | MAF         | beta         | SE          | p-value                    | locus                                 |
|----------------|-------------------|-----------|--------------------|-------------|--------------|-------------|----------------------------|---------------------------------------|
| PCB199         | rs1400087         | 1         | 106,108,925        | 0.07        | 0.33         | 0.07        | 7.6x10 <sup>-7</sup>       | lincRNA                               |
| PCB180         | <i>rs1400087</i>  | <i>1</i>  | <i>106,108,925</i> | <i>0.08</i> | <i>0.32</i>  | <i>0.06</i> | <i>1.1x10<sup>-7</sup></i> | lincRNA                               |
| PCB199         | rs6660284         | 1         | 106,115,714        | 0.08        | 0.34         | 0.07        | 7.2x10 <sup>-7</sup>       | lincRNA                               |
| PCB180         | <i>rs6660284</i>  | <i>1</i>  | <i>106,115,714</i> | <i>0.08</i> | <i>0.33</i>  | <i>0.06</i> | <i>1.2x10<sup>-7</sup></i> | lincRNA                               |
| BDE-100        | rs829661          | 2         | 30,726,691         | 0.19        | 0.37         | 0.07        | 2.3x10 <sup>-7</sup>       | <i>LCLAT1</i>                         |
| BB-153         | rs114147886       | 3         | 17,854,598         | 0.02        | 0.82         | 0.15        | 7.6x10 <sup>-8</sup>       | near <i>TBC1D5</i>                    |
| BDE-28         | rs76882575        | 3         | 179,782,262        | 0.04        | 0.49         | 0.10        | 8.1x10 <sup>-7</sup>       | near <i>PEX5L</i>                     |
| PCB118         | rs11755413        | 6         | 125,846,604        | 0.10        | 0.28         | 0.05        | 2.8x10 <sup>-7</sup>       | between <i>HEY2</i> and <i>HDDC2</i>  |
| BDE-47         | rs1034591         | 7         | 114,443,038        | 0.43        | -0.27        | 0.05        | 6.3x10 <sup>-7</sup>       | between <i>FOXP2</i> and <i>MDFIC</i> |
| <b>PCB187</b>  | <b>rs72692916</b> | <b>9</b>  | <b>8,446,518</b>   | <b>0.05</b> | <b>-0.42</b> | <b>0.08</b> | <b>2.8x10<sup>-8</sup></b> | <b><i>PTPRD</i></b>                   |
| BDE-28         | rs72896141        | 11        | 5,845,481          | 0.05        | 0.40         | 0.08        | 5.6x10 <sup>-7</sup>       | <i>TRIM5</i>                          |
| BB-153         | rs763311          | 12        | 12,796,067         | 0.01        | 0.89         | 0.17        | 1.6x10 <sup>-7</sup>       | <i>CREBL2</i>                         |
| PCB138/158     | rs61989804        | 14        | 65,697,140         | 0.05        | -0.38        | 0.07        | 1.3x10 <sup>-7</sup>       | pseudogenes                           |
| BDE-153        | rs8054028         | 16        | 73,159,970         | 0.17        | -0.39        | 0.07        | 2.1x10 <sup>-7</sup>       | near c16orf47                         |
| BDE-99         | rs117896058       | 18        | 8,168,060          | 0.01        | 1.33         | 0.26        | 5.4x10 <sup>-7</sup>       | <i>PTPRM</i>                          |
| <b>BDE-100</b> | <b>rs72913475</b> | <b>18</b> | <b>44,170,156</b>  | <b>0.08</b> | <b>0.55</b>  | <b>0.10</b> | <b>4.6x10<sup>-8</sup></b> | <b><i>LOXHD1</i></b>                  |

In each category the results are shown in alphanumeric order. The genome-wide significant associations are shown in **bold** and the suggestively significant associations are in *italics*. Genome-wide association threshold is  $P=5 \times 10^{-8}$  and suggestive association threshold is  $P=5 \times 10^{-7}$ . Abbreviations: CHR: chromosome; BP: position; SE: standard error

## Figure Legends

**Figure S1.** Multi-dimensional scaling plot of EMA (a) maternal and (b) newborn cohort, and (c) non-overlapping Caucasian, Asian and Hispanic EMA maternal groups. Each individual is represented with a dot and the distance between two individuals represents the genetic distance between them and summarizes the ancestry differences. The X-axis represents the first ancestry coordinate that explains 57.6% and 52.7% of the total genetic variance of the (a) maternal and (b) fetal cohort, respectively. The Y-axis represents the second ancestry coordinate that explains 25.3% and 25.5% of the total genetic variance of the (a) maternal and (b) fetal cohort, respectively; (c) Clustering of 90% of EMA mothers in three non-overlapping ethnic groups. Abbreviations: White: Caucasians; ASN: Asians; HIS: Hispanics; SOUTH ASN: Indians; AFR: African-Americans; OTHERS: mixed ancestry, unknown ancestry, other ancestry (based on self-reported ancestry groups); not compared: individuals not used in analyses comparing ancestry groups.

**Figure S2.** Residual PBDE congener serum levels by ASD outcome after covariate adjustment.

Boxplot of residual levels of BDE-100 (a), BDE-153 (b) and Sum PBDE (c) in mothers of ASD controls (white) and ASD cases (light grey) obtained with a linear regression after adjustment for sociodemographic covariates. Two-sample Mann-Whitney Wilcoxon test:

\*  $P < 0.05$ ; \*\*  $P < 0.01$ .

**Figure S3.** Linear non-parametric correlation coefficients for 19 organohalogen. Correlation coefficients across organohalogen (total sum of PBDEs and PCBs were excluded) calculated with Spearman's test. From weakest to strongest, positive correlation coefficients are represented in a red gradient; negative correlation coefficients are displayed in a blue gradient.

**Figure S4.** Linkage disequilibrium regional genomic plots of maternal suggestively associated SNPs with PCBs and BB-153 serum levels. (a) rs35560597 associated with sum PCB maps near *FST* and *NDUFS4* on chromosome 5q11.2 ( $\beta=0.79$ ,  $SE=0.15$ ,  $P=7.9 \times 10^{-8}$ ), (b) rs75107653 on chromosome 3p26.1 (PCB196/203,  $\beta=0.57$ ,  $SE=0.11$ ,  $P=8.6 \times 10^{-8}$ ) maps near *SETMAR* and *SUMF1*, (c) rs4945829 on chromosome 6q21 (PCB196/203,  $\beta=-0.16$ ,  $SE=0.03$ ,  $P=1.1 \times 10^{-7}$ ) maps to *CCDC162P* and near *CD164*, (d) rs10500669 on chromosome 11p15.4 (PCB187,  $\beta=0.20$ ,  $SE=0.04$ ,  $P=2.5 \times 10^{-7}$ ) is located near *PRKCDBP* and (e) rs56385737 on chromosome 18p11.31 (BB-153,  $\beta=0.44$ ,  $SE=0.08$ ,  $P=3.1 \times 10^{-7}$ ) maps to the *DLGAP1* gene. The X-axis represents the genomic position; the Y-axis shows the negative logarithm of the observed association p-value for each tested SNP and the recombination rate. Plotted with LocusZoom tool (Pruim *et al.* 2011;).

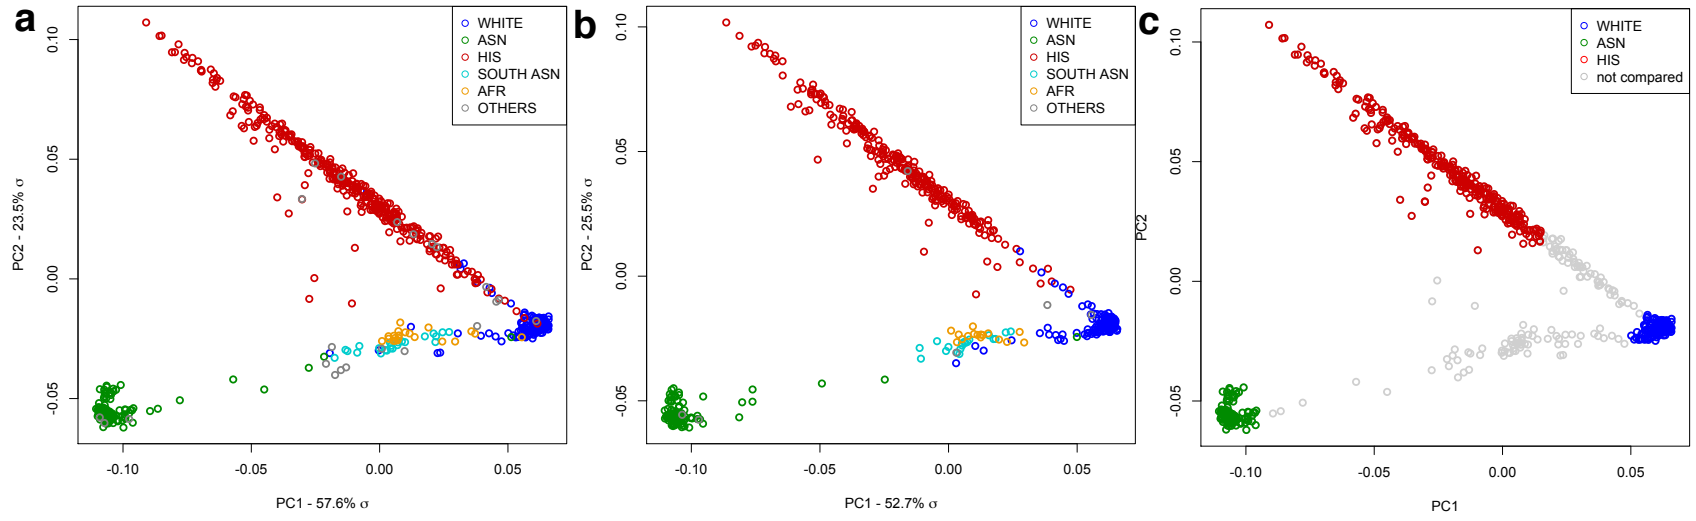

Figure S1

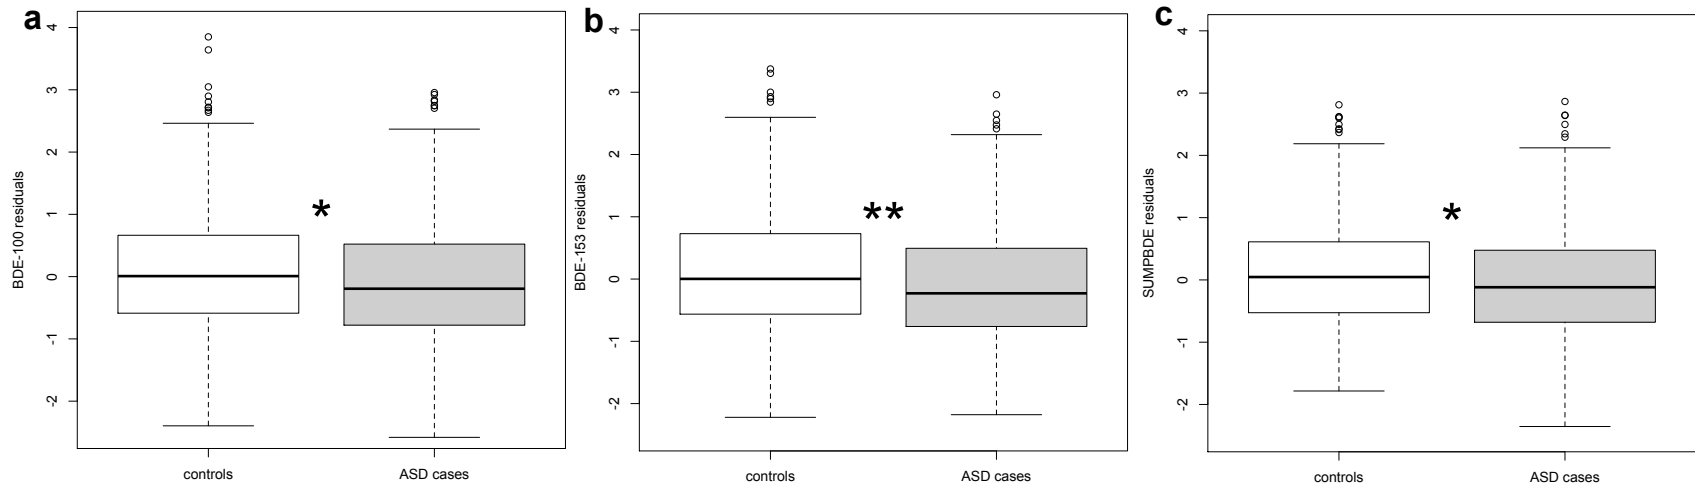

Figure S2

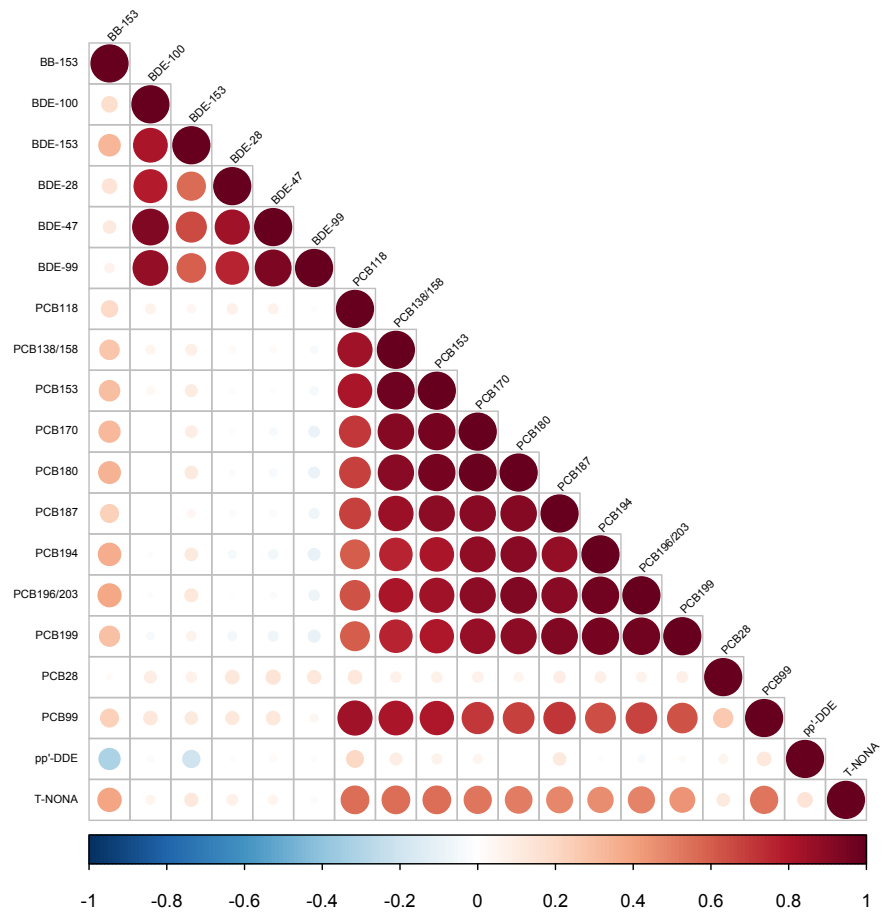

Figure S3
